# Supplementary material for: Copolymers of vinyl epoxides with carbon monoxide
Source: Royal Society of Chemistry journal article supplement (doi:10.1039/b006641i), 2000-01-01
Supplement: b006641i.doc [file b006641i.doc]

**Copolymers of Vinyl Epoxides with Carbon Monoxide**

**Jong Tae Lee and Howard Alper***

Centre for Catalysis Research and Innovation, Department of Chemistry, University of

Ottawa, 10 Marie Curie, Ottawa, Ontario, Canada K1N 6N5

**General Procedure for the Copolymerization of Vinyl Epoxides with Carbon Monoxide** The copolymerization was carried out in a 45 ml autoclave. A mixture of [Pd(MeCN)4](BF4)2 (0.02 mmol), (R,R) - Me - DUPHOS (0.02 mmol), 1,4-naphthoquinone ( 0.25 mmol), formic acid (0.6 mmol) and vinyl epoxide (8 mmol) in 2 ml of nitromethane and 2 ml of chloroform was charged in the autoclave under N2. The autoclave was flushed 3 times with carbon monoxide and pressurized to 1,000 psi of carbon monoxide and then heated at 40 oC with magnetic stirring. After reaction, the mixture was diluted with 5 ml of methylene chloride and filtered through a short Celite column to remove the catalyst. The solvent was reduced to about 2 ml under reduced pressure, and then the polymer was precipitated in ether. The solids were filtered, extracted with methanol, and then dried under vacuum.

## Spectral Data of Copolymers [poly(1,4-ketone ) structure]

**1** : 13C NMR (75 MHz, DMSO-d6, ppm) ; 211.8, 51.5, 46.5, 44.5, 43.5, 29.4, 27.3., IR(KBr, cm-1) ; 1706, 1260, 914, 835., Anal. Calcd: C, 66.65, H, 7.99. Found: C, 66.13, H, 7.89.

**3** : 13C NMR (75 MHz, DMSO-d6, ppm) ; 211.9, 51.8, 46.2, 45.4, 43.8, 31.9, 30.4, 26.2, 25.7., IR (KBr, cm-1) ; 1702, 1261, 915, 834., Anal. Calcd: C,70.10, H,9.10. Found: C, 69.44, H, 9.08.

**4** : 13C NMR (75 MHz, DMSO-d6, ppm) ; 211.8, 51.4, 45.9, 45.2, 43.7, 33.1, 31.8, 28.6, 28.4, 28.2, 25.4., IR (KBr, cm-1) ; 1706, 1260, 914, 833., Anal. Calcd: C,72.49, H,9.95. Found:

C,71.78, H,9.81.

**5** : 13C NMR (75 MHz, DMSO-d6, ppm) ; 211.6, 52.1, 51.9, 50.9, 50.7, 36.1, 33.8, 30.5, 29.8, 26.2, 24.8, 24.2, 23.3., IR (KBr, cm-1) ; 1706, 1262, 908, 843., Anal. Calcd: C, 71.03, H, 7.94. Found: C, 71.83, H, 8.32.

**6** : 13C NMR (75 MHz, DMSO-d6, ppm) ; 209.4, 71.4, 71.3, 50.3, 50.1, 46.3, 43.3., IR (KBr, cm-1) ; 1707, 1253, 907, 853., Anal. Calcd: C, 59.15, H, 7.09. Found: C, 58.83, H, 7.15.

Molar optical rotation [poly(spiroketal/1,4-ketone)structure] ; [D24 = + 3.4o (c=6.1mg/ml,

DMSO).
